# Supplementary material for: Association of Isolated Diastolic Hypertension Based on the Cutoff Value in the 2017 American College of Cardiology/American Heart Association Blood Pressure Guidelines With Subsequent Cardiovascular Events in the General Population
Source: PubMed Central journal article supplement — J Am Heart Assoc. 2020 Sep 30;9(19):e017963. doi: 10.1161/JAHA.120.017963 (PMC7792382; doi:10.1161/jaha.120.017963), 2020-09-30
Supplement: JAH3-9-e017963-s001.pdf [file JAH3-9-e017963-s001.pdf]

# **SUPPLEMENTAL MATERIAL**

**Table S1. Multivariable Cox Regression Analysis for Heart Failure after Multiple Imputation.**

|                                         | Hazard Ratio | 95% Confidence Interval | <i>P</i> Value |
|-----------------------------------------|--------------|-------------------------|----------------|
| Category of Diastolic Blood Pressure    |              |                         |                |
| Normal                                  | Reference    |                         |                |
| Stage 1 Isolated Diastolic Hypertension | 1.16         | 1.12-1.21               | < 0.001        |
| Stage 2 Isolated Diastolic Hypertension | 1.41         | 1.26-1.58               | < 0.001        |
| Systolic Blood Pressure (per 10 mmHg)   | 1.02         | 1.00-1.03               | 0.064          |
| Age, years                              | 1.06         | 1.05-1.06               | < 0.001        |
| Male Sex                                | 0.96         | 0.92-0.99               | 0.011          |
| Obesity                                 | 1.14         | 1.09-1.20               | < 0.001        |
| High Waist Circumference                | 1.17         | 1.11-1.22               | < 0.001        |
| Diabetes Mellitus                       | 1.52         | 1.42-1.63               | < 0.001        |
| Dyslipidemia                            | 1.08         | 1.05-1.12               | < 0.001        |
| Current Cigarette Smoking               | 1.00         | 0.97-1.04               | 0.867          |

**Table S2. Multivariable Cox Regression Analysis for Atrial Fibrillation after Multiple Imputation.**

|                                         | Hazard Ratio | 95% Confidence Interval | <i>P</i> Value |
|-----------------------------------------|--------------|-------------------------|----------------|
| Category of Diastolic Blood Pressure    |              |                         |                |
| Normal                                  | Reference    |                         |                |
| Stage 1 Isolated Diastolic Hypertension | 1.20         | 1.11-1.29               | < 0.001        |
| Stage 2 Isolated Diastolic Hypertension | 1.26         | 1.02-1.56               | 0.032          |
| Systolic Blood Pressure (per 10 mmHg)   | 0.98         | 0.95-1.01               | 0.141          |
| Age, years                              | 1.08         | 1.08-1.09               | < 0.001        |
| Male Sex                                | 2.40         | 2.23-2.58               | < 0.001        |
| Obesity                                 | 1.08         | 0.99-1.17               | 0.086          |
| High Waist Circumference                | 1.38         | 1.28-1.50               | < 0.001        |
| Diabetes Mellitus                       | 1.13         | 0.99-1.29               | 0.079          |
| Dyslipidemia                            | 0.84         | 0.80-0.89               | < 0.001        |
| Current Cigarette Smoking               | 0.94         | 0.89-1.01               | 0.073          |

**Table S3. Multivariable Cox Regression Analysis for Composite Endpoint defined as Myocardial Infarction and Stroke after Multiple Imputation.**

|                                         | Hazard Ratio | 95% Confidence Interval | <i>P</i> Value |
|-----------------------------------------|--------------|-------------------------|----------------|
| Category of Diastolic Blood Pressure    |              |                         |                |
| Normal                                  | Reference    |                         |                |
| Stage 1 Isolated Diastolic Hypertension | 1.23         | 1.17-1.30               | < 0.001        |
| Stage 2 Isolated Diastolic Hypertension | 1.55         | 1.35-1.79               | < 0.001        |
| Systolic Blood Pressure (per 10 mmHg)   | 1.06         | 1.03-1.08               | < 0.001        |
| Age, years                              | 1.08         | 1.08-1.08               | < 0.001        |
| Male Sex                                | 0.98         | 0.94-1.03               | 0.475          |
| Obesity                                 | 1.04         | 0.98-1.10               | 0.245          |
| High Waist Circumference                | 1.10         | 1.04-1.17               | 0.001          |
| Diabetes Mellitus                       | 1.55         | 1.42-1.69               | < 0.001        |
| Dyslipidemia                            | 1.19         | 1.15-1.24               | < 0.001        |
| Current Cigarette Smoking               | 1.26         | 1.21-1.32               | < 0.001        |

**Table S4. Multivariable Cox Regression Analysis for Composite Endpoint.**

|                                         | Hazard Ratio | 95% Confidence Interval | <i>P</i> Value |
|-----------------------------------------|--------------|-------------------------|----------------|
| Category of Diastolic Blood Pressure    |              |                         |                |
| Normal                                  | Reference    |                         |                |
| Stage 1 Isolated Diastolic Hypertension | 1.16         | 1.12-1.20               | < 0.001        |
| Stage 2 Isolated Diastolic Hypertension | 1.29         | 1.17-1.42               | < 0.001        |
| Systolic Blood Pressure (per 10 mmHg)   | 1.04         | 1.03-1.05               | < 0.001        |
| Age, years                              | 1.06         | 1.06-1.06               | < 0.001        |
| Male Sex                                | 1.00         | 0.97-1.03               | 0.779          |
| Obesity                                 | 1.06         | 1.02-1.11               | 0.002          |
| High Waist Circumference                | 1.12         | 1.08-1.17               | < 0.001        |
| Diabetes Mellitus                       | 1.46         | 1.38-1.54               | < 0.001        |
| Dyslipidemia                            | 1.20         | 1.17-1.23               | < 0.001        |
| Current Cigarette Smoking               | 1.04         | 1.01-1.07               | 0.019          |
